# Supplementary material for: Caffeine increases myoglobin expression via the cyclic AMP pathway in L6 myotubes
Source: PubMed Central journal article supplement (PMC8123560; doi:10.14814/phy2.14869), 2021-05-15

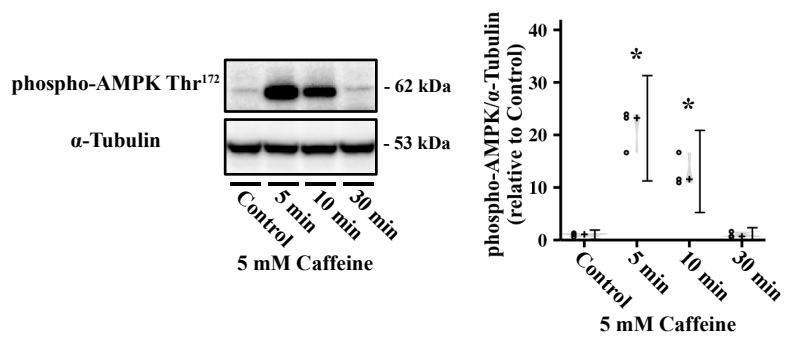

Supplement: PHY2-9-e14869-s001.pdf [file PHY2-9-e14869-s001.pdf]
